# Supplementary material for: In Vitro Analysis of the Antagonistic Biological and Chemical Interactions between the Endophyte Sordaria tomento-alba and the Phytopathogen Botrytis cinerea
Source: MDPI journal article supplement (doi:10.3390/ijms25021022), 2024-01-13
Supplement: s1 [file s1]

## Supplementary Materials

### ***In vitro* analysis of the antagonistic biological and chemical interactions between the endophyte *Sordaria tomento-alba* and the phytopathogen *Botrytis cinerea***

Hernando José Bolívar-Anillo<sup>2,3†</sup>, Inmaculada Izquierdo-Bueno<sup>1,2†</sup>, Estrella González-Rey<sup>2</sup>, Victoria E. González-Rodríguez<sup>1</sup>, Jesús M. Cantoral<sup>1</sup>, Isidro G. Collado<sup>2\*</sup> and Carlos Garrido<sup>1\*</sup>

<sup>1</sup> Departamento de Biomedicina, Biotecnología y Salud Pública, Laboratorio de Microbiología, Facultad de Ciencias del Mar y Ambientales, Universidad de Cádiz, 11510, Puerto Real, Spain.

<sup>2</sup> Departamento de Química Orgánica, Facultad de Ciencias, Campus Universitario Río San Pedro s/n, Torre sur, 4<sup>a</sup> planta, Universidad de Cádiz, 11510, Puerto Real, Cádiz, Spain.

<sup>3</sup> Programa de Microbiología, Facultad de Ciencias Básicas y Biomédicas, Universidad Simón Bolívar, Barranquilla, Colombia.

† Hernando José Bolívar-Anillo and Inmaculada Izquierdo-Bueno have contributed equally to this work

\* Correspondence: Isidro G. Collado, [isidro.gonzalez@uca.es](mailto:isidro.gonzalez@uca.es); Carlos Garrido, [carlos.garrido@uca.es](mailto:carlos.garrido@uca.es)

#### **Table of contents:**

|                                          |       |
|------------------------------------------|-------|
| Spectroscopic constant Tables S1-S7..... | S2-S8 |
|------------------------------------------|-------|

**Table S1. NMR Spectroscopic data of *trans*-sordariol (1) (<sup>1</sup>H at 500 MHz, <sup>13</sup>C at 125 MHz, CD<sub>3</sub>OD).**

| Position | Proton | δ <sub>H</sub> (Hz)                        | δ <sup>13</sup> C | HMBC               |
|----------|--------|--------------------------------------------|-------------------|--------------------|
| 1        | H-1    | -                                          | 125.2             |                    |
| 2        | H-2    | -                                          | 157.3             |                    |
| 3        | H-3    | 6.7 (1H, dd, <i>J</i> = 8.0, 1.2 Hz)       | 115.4             | C1, C2, C5         |
| 4        | H-4    | 7.06 (1H, t, <i>J</i> = 8.0 Hz)            | 129.7             | C2, C6             |
| 5        | H-5    | 7.0 (1H, dd, <i>J</i> = 8.0, 1.2 Hz)       | 118.7             | C1, C3, C4, C6     |
| 6        | H-6    | -                                          | 139.7             |                    |
| 7        | H-7    | 4.8 (1H, s)                                | 56.6              | C1, C2, C6         |
| 1'       | H-1'   | 6.98 (1H, d, <i>J</i> = 15.7, 1.0 Hz)      | 130.6             | C1, C3', C5, C6    |
| 2'       | H-2'   | 6.17 (1H, dd, <i>J</i> = 15.7, 6.6 Hz)     | 132.6             | C3', C4', C6       |
| 3'       | H-3'   | 4.1 (1H, ddd, <i>J</i> = 6.6, 4.9, 1.3 Hz) | 78.0              | C1', C2', C4', C5' |
| 4'       | H-4'   | 3.8 (1H, qd, <i>J</i> = 6.4, 4.9 Hz)       | 71.7              | C2', C3', C5'      |
| 5'       | H-5'   | 1.2 (3H, d, <i>J</i> = 6.4 Hz)             | 18.9              | C3', C4'           |

**Table S2. NMR Spectroscopic data of *trans*-sordarial (2) (<sup>1</sup>H at 500 MHz, <sup>13</sup>C at 125 MHz, CDCl<sub>3</sub>).**

| Position | Proton | $\delta_{\text{H}}$ (Hz)              | $\delta^{13}\text{C}$ | HMBC                 |
|----------|--------|---------------------------------------|-----------------------|----------------------|
| 1        | H-1    | -                                     | 117.3                 |                      |
| 2        | H-2    | -                                     | 162.8                 |                      |
| 3        | H-3    | 6.9 (1H, dt, $J = 8.4, 0.9$ Hz)       | 117.3                 | C1, C2, C5           |
| 4        | H-4    | 7.46 (1H, dd $J = 8.4, 7.7$ Hz)       | 137.2                 | C2, C6               |
| 5        | H-5    | 6.94 (1H, dt, $J = 7.7, 0.9$ Hz)      | 118.9                 | C1, C3, C4, C1'      |
| 6        | H-6    | -                                     | 142.1                 |                      |
| 7        | H-7    | 10.3 (1H, s)                          | 195.2                 | C1, C2               |
| 1'       | H-1'   | 7.2 (1H, dt, $J = 15.7, 1.0$ Hz)      | 126.9                 | C1, C2', C3', C5, C6 |
| 2'       | H-2'   | 6.2 (1H, dd, $J = 15.7, 6.1$ Hz)      | 134.8                 | C1', C3', C4', C6    |
| 3'       | H-3'   | 4.3 (1H, ddd, $J = 6.1, 3.5, 1.5$ Hz) | 75.8                  | C1', C2', C4'        |
| 4'       | H-4'   | 4.0 (1H, qd, $J = 6.5, 3.5$ Hz)       | 70.2                  | C2'                  |
| 5'       | H-5'   | 1.2 (3H, d, $J = 6.5$ Hz)             | 17.7                  | C3', C4'             |

**Table S3. NMR Spectroscopic data of 3'-episordariol (3) (<sup>1</sup>H at 500 MHz, <sup>13</sup>C at 125 MHz, (CDCl<sub>3</sub>)).**

| Position | Proton | δ <sub>H</sub> (Hz)                           | δ <sup>13</sup> C | HMBC       |
|----------|--------|-----------------------------------------------|-------------------|------------|
| 1        | H-1    | -                                             | 121.8             |            |
| 2        | H-2    | -                                             | 156.5             |            |
| 3        | H-3    | 6.83 (1H, d(superimposed), <i>J</i> = 7.9 Hz) | 116.2             | C2, C5     |
| 4        | H-4    | 7.16 (1H, t, <i>J</i> = 7.8 Hz)               | 129.1             | C2, C6     |
| 5        | H-5    | 6.94 (1H, dd, <i>J</i> = 7.8, 1.1 Hz)         | 118.9             | C1, C3, C4 |
| 6        | H-6    | -                                             | 136.2             |            |
| 7        | H-7    | 5.0 (1H, s)                                   | 60.2              |            |
| 1'       | H-1'   | 6.85 (1H, d, <i>J</i> = 15.7 Hz)              | 129.6             | C3', C5    |
| 2'       | H-2'   | 6.1 (1H, dd, <i>J</i> = 15.7, 6.6 Hz)         | 131.0             | C-6        |
| 3'       | H-3'   | 4.3 (1H, s(br))                               | 76.2              |            |
| 4'       | H-4'   | 4.0 (1H, dd(br), <i>J</i> = 6.4, 3.6 Hz)      | 70.3              | C2'        |
| 5'       | H-5'   | 1.2 (3H, d, <i>J</i> = 6.5 Hz)                | 17.7              | C3', C4'   |
|          |        |                                               |                   |            |

**Table S4. NMR Spectroscopic data of heptacyclosordariolone (4) (<sup>1</sup>H at 500 MHz, <sup>13</sup>C at 125 MHz, Cl<sub>3</sub>CD).**

| Position | Proton | δ <sub>H</sub> (Hz)                  | δ <sup>13</sup> C | HMBC             |
|----------|--------|--------------------------------------|-------------------|------------------|
| 1        | H-1    | -                                    | 126.7             |                  |
| 2        | H-2    | -                                    | 151.8             |                  |
| 3        | H-3    | 6.7 (1H, dd, <i>J</i> = 7.7, 0.8 Hz) | 131.0             | C5               |
| 4        | H-4    | 7.13 (1H, t, <i>J</i> = 7.7 Hz)      | 127.9             | C2, C6           |
| 5        | H-5    | 6.9 (1H, dd, <i>J</i> = 7.7, 0.8 Hz) | 123.4             | C1, C3, C4, C1'  |
| 6        | H-6    | -                                    | 137.1             |                  |
| 7        | H-7a   | 4.64 (1H, d, <i>J</i> = 14 Hz)       | 56.7              | C1, C2, C6, C3'  |
|          | H-7b   | 5.1 (1H, d, <i>J</i> = 14 Hz)        |                   | C1, C2, C6, C3'  |
| 1'       | H-1'   | 6.7 (1H, d, <i>J</i> = 12.5 Hz)      | 114.6             | C1, C2', C3', C5 |
| 2'       | H-2'   | 5.97 (1H, d, <i>J</i> = 12.5 Hz)     | 130.9             | C3', C6          |
| 3'       | H-3'   | -                                    | 104.0             |                  |
| 4'       | H-4'   | 4.15 (1H, q, <i>J</i> = 6.5 Hz)      | 66.9              | C5', C3', C2'    |
| 5'       | H-5'   | 1.1 (3H, d, <i>J</i> = 6.5 Hz)       | 16.1              | C3', C4'         |
| C2-OH    |        |                                      |                   | C1, C2           |

**Table S5. NMR Spectroscopic data of cyclosordariolone (5) (<sup>1</sup>H at 400 MHz, <sup>13</sup>C at 100 MHz, CD<sub>3</sub>OD).**

| Position | Proton | δ <sub>H</sub> (Hz)              | δ <sup>13</sup> C | HMBC         |
|----------|--------|----------------------------------|-------------------|--------------|
| 1        | H-1    | -                                | 126.3             |              |
| 2        | H-2    | -                                | 156.6             |              |
| 3        | H-3    | 6.91 (1H, d, <i>J</i> =8.5 Hz)   | 118.3             | C1, C5       |
| 4        | H-4    | 7.47 (1H, d, <i>J</i> =8.5 Hz)   | 127.3             | C2, C6, C4'  |
| 5        | H-5    | -                                | 139.0             |              |
| 6        | H-6    | -                                | 129.9             |              |
| 7        | H-7a   | 4.9 (1H, d, <i>J</i> = 11.8 Hz)  | 55.0              | C1, C2, C6   |
|          | H-7b   | 4.84 (1H, d, <i>J</i> = 11.8 Hz) |                   |              |
| 1'       | H-1'   | 7.97 (1H, d, <i>J</i> = 10.3 Hz) | 143.3             | C1, C5, C3'  |
| 2'       | H-2'   | 6.14 (1H, d, <i>J</i> = 10.3 Hz) | 124.3             | C4', C6      |
| 3'       | H-3'   | -                                | 206.8             |              |
| 4'       | H-4'   |                                  | 77.5              |              |
| 5'       | H-5'   | 1.45 (3H, s)                     | 32.2              | C3', C4', C5 |

**Table S6. NMR Spectroscopic data of sordamentone A (6) (<sup>1</sup>H at 500 MHz, <sup>13</sup>C at 125 MHz, Cl<sub>3</sub>CD).**

| Position | Proton | δ <sub>H</sub> (Hz)                    | δ <sup>13</sup> C | HMBC             |
|----------|--------|----------------------------------------|-------------------|------------------|
| 1        | H-1    | -                                      | 125.3             |                  |
| 2        | H-2    | -                                      | 150.1             |                  |
| 3        | H-3    | 6.68 (1H, dt, <i>J</i> =8.1, 0.7 Hz)   | 114.4             | C1, C2, C5       |
| 4        | H-4    | 7.16 (1H, dd, <i>J</i> =8.1, 7.4 Hz)   | 129.5             | C2, C6           |
| 5        | H-5    | 6.73 (1H, dt, <i>J</i> = 7.4, 0.7 Hz)  | 113.4             | C1, C3, C6       |
| 6        | H-6    | -                                      | 143.1             |                  |
| 7        | H-7a   | 5.15 (1H, dd, <i>J</i> = 12.3, 2.8 Hz) | 70.8              | C1, C2, C6, C1', |
|          | H-7b   | 5.07 (1H, dt, <i>J</i> = 12.3, 1.8 Hz) |                   | C1,C2, C6 C1',   |
| 1'       | H-1'   | 5.72 (1H, q, <i>J</i> = 3.6, 2.8 Hz)   | 80.5              | C6               |
| 2'       | H-2a'  | 3.06 (1H, dd, <i>J</i> = 16, 7.8 Hz)   | 44.5              | C1', C3', C6     |
|          | H-2b'  | 2.86 (1H, dd. <i>J</i> = 16, 4.7 Hz)   |                   | C1', C3', C6     |
| 3'       | H-3'   | -                                      | 210.5             |                  |
| 4'       | H-4'   | 4.27 (1H, q, <i>J</i> = 7.2 Hz)        | 73.4              | C3', C5'         |
| 5'       | H-5'   | 1.41 (3H, d, <i>J</i> = 7.2 Hz)        | 19.3              | C3', C4'         |
| C2-OH    |        | 4.94 (1H, s(br))                       |                   |                  |
| C4'-OH   |        | 3.6 (1H, s(br))                        |                   |                  |

**Table S7. NMR Spectroscopic data of sordamentone B (7) (<sup>1</sup>H at 500 MHz, <sup>13</sup>C at 125 MHz, Cl<sub>3</sub>CD).**

| Position | Proton | δ <sub>H</sub> (Hz)                          | δ <sup>13</sup> C | HMBC             |
|----------|--------|----------------------------------------------|-------------------|------------------|
| 1        | H-1    | -                                            | 125.3             |                  |
| 2        | H-2    | -                                            | 150.1             |                  |
| 3        | H-3    | 6.69 (1H, d(br), <i>J</i> =8.0 Hz)           | 114.4             | C1, C2, C5       |
| 4        | H-4    | 7.17 (1H, dd, <i>J</i> =8.0, 7.5 Hz)         | 129.5             | C2, C6           |
| 5        | H-5    | 6.75 (1H, d(br), <i>J</i> = 7.5 Hz)          | 113.4             | C1, C3, C6       |
| 6        | H-6    | -                                            | 143.1             |                  |
| 7        | H-7a   | 5,15 (1H, ddd, <i>J</i> = 12.3, 2.6, 1.1 Hz) | 70.8              | C1, C2, C6, C1', |
|          | H-7b   | 5.07 (1H, dt, <i>J</i> = 12.3, 2.6 Hz)       |                   | C1,C2, C6 C1',   |
| 1'       | H-1'   | 5.72 (1H, m)                                 | 80.5              | C6               |
| 2'       | H-2a'  | 2.96 (1H, dd, <i>J</i> = 16, 8 Hz)           | 44.5              | C1', C3', C6     |
|          | H-2b'  | 2.91 (1H, dd. <i>J</i> = 16, 4.4 Hz)         |                   | C1', C3', C6     |
| 3'       | H-3'   | -                                            | 210.5             |                  |
| 4'       | H-4'   | 4.30 (1H, q, <i>J</i> = 7.1 Hz)              | 73.4              | C3', C5'         |
| 5'       | H-5'   | 1.38 (3H, d, <i>J</i> = 7.1 Hz)              | 19.3              | C3', C4'         |
| C2-OH    |        | 5.05 (1H, s(br))                             |                   |                  |
| C4'-OH   |        | 3.6 (1H, s(br))                              |                   |                  |
